# Supplementary material for: Comparative Analysis of Anther Transcriptome Profiles of Two Different Rice Male Sterile Lines Genotypes under Cold Stress
Source: MDPI journal article supplement (doi:10.3390/ijms160511398), 2015-05-18
Supplement: s1 [file s1]

## Supplementary Information

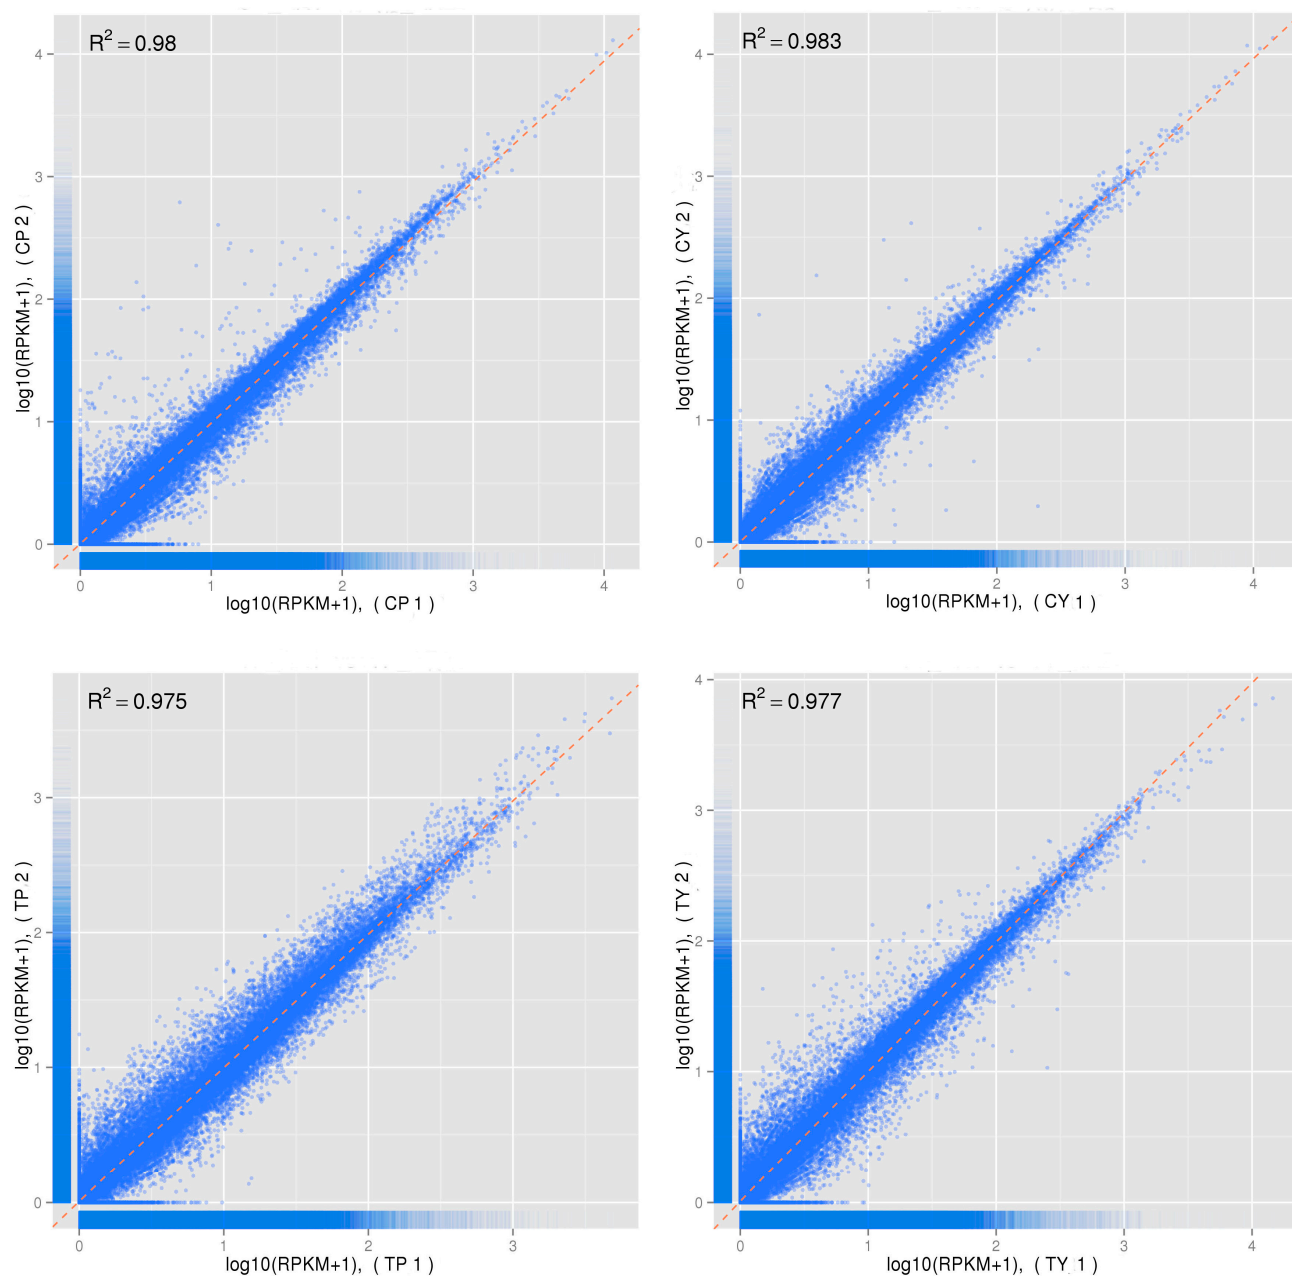

**Figure S1.** Scatterplots of the Pearson correlation coefficient comparing gene expression scores from biological replicates of each sample. Number 1, 2 denote biological replicates of each sample, respectively.
